# Supplementary material for: OFP1 Interaction with ATH1 Regulates Stem Growth, Flowering Time and Flower Basal Boundary Formation in Arabidopsis
Source: MDPI journal article supplement (doi:10.3390/genes9080399), 2018-08-06
Supplement: s1 [file s1]

1. *Atath1* was created and confirmed :

AtATH1            5'-TGGAACATAGAGGTTTCT TGAGTC-3',  
                      5'-TCTATCGATGTTCAAGATAACCGC-3'  
T-DNA primer    5'-GTGGATTGAT GTGATAT CTCC-3'

2. DNA fragments containing the homeodomain (HD) and SKY-BELL domain of ATH1

HD                5'-CTCCACGGTCTATCGATGTTCA-3',  
                      5'-CCCCACATGTT GTTTGAGGAA-3';  
SKY-BELL        5'-TCGGTGAAGAAGATTTCCCGTT-3',  
                      5'-TGATGCAAGA CTCAATGAAAGCTC-3'

3. Clone of *OFPI* and *ATH1*

*ATH1*        5'-TCCTCCACTTCATCCTTTGG-3'  
                  5'-CGTTGGGTTGAATGTGACTG-3'  
*OFPI*        5'-ATGGGT-AATAACTATCGGTTTAAGCT-3'  
                  5'-TTATTTGGAATGGGGTGGTGGAAGA-3'

4. qRT-PCR assay(5'-3')

APT: TCCCAGAATCGCTAAGATTGCC, CCTTTCCCTTAAGCTCTG  
*GA2ox1*: GTGTCGTACGAGGTGTTGGAGA , CCAAGTCTATAATCACCA AGC  
*FLC*: ACCTTCTCCAAACGTCGCAA, CGGAGATTTGTCCAGCAGGT  
*ATH1*: AGGCGGGTTTCG GATCTACAT, TTATTTATGCATTGCTTGGCT  
*OFPI*: GAAACACCACGCAGTCCCTA, GCGTAAAGGTTGCGGTTTT  
*ACT1*:CCAGAAGGATGCATATGTTGGTGA,GAGGAGCCTCGGTAAGAAGA
